# Supplementary material
Source: PubMed Central journal article supplement (PMC4783152)
Supplement: NIHMS764361-supplement-supplement_1.pdf [file NIHMS764361-supplement-supplement_1.pdf]

**Immunity, Volume 38**

**Supplemental Information**

**Activation of the Innate Signaling Molecule MAVS**

**by Bunyavirus Infection Upregulates**

**the Adaptor Protein SARM1, Leading to Neuronal Death**

**Piyali Mukherjee, Tyson Woods, Roger A. Moore, and Karin E. Peterson**

**Supplemental Inventory**

**Supplemental Figures and Tables**

Figure S1, Related to Figure 3

Figure S2, Related to Figure 4

Figure S3, Related to Figure 2

Figure S4, Related to Figure 5

Figure S5, Related to Figure 6

Figure S6, Related to Figure 7

Fig. S1.

A WT, Mock

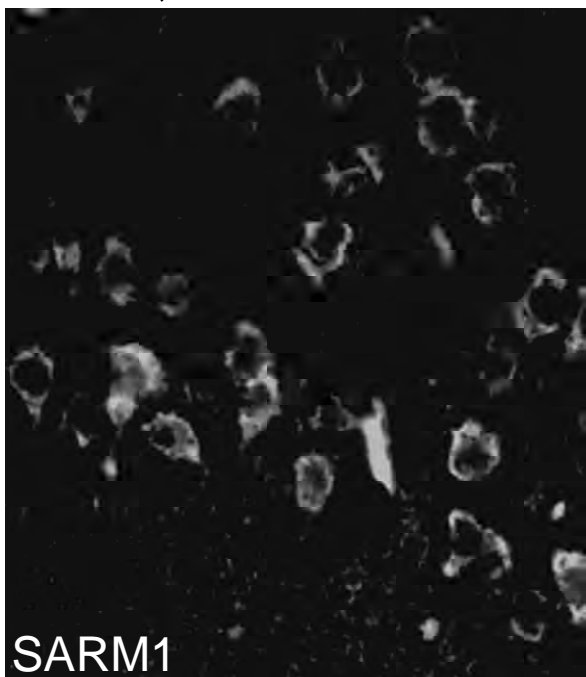

B WT, LACV

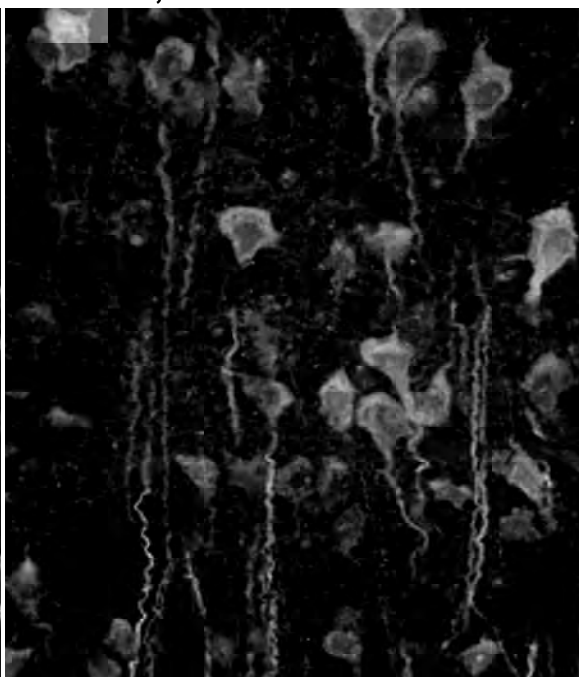

C

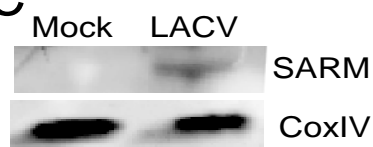

D WT, Mock

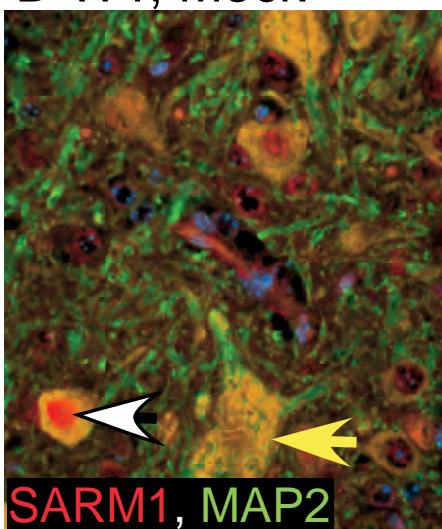

E WT, LACV

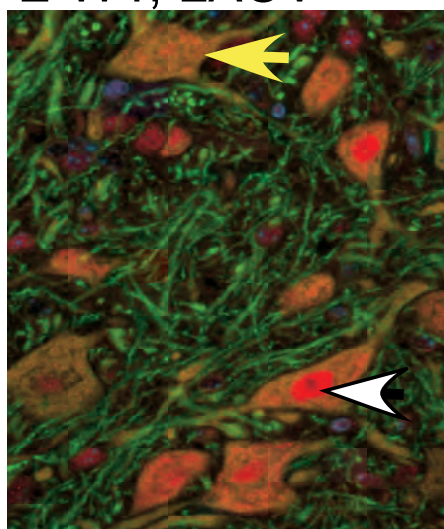

F *Sarm1*<sup>-/-</sup>, LACV

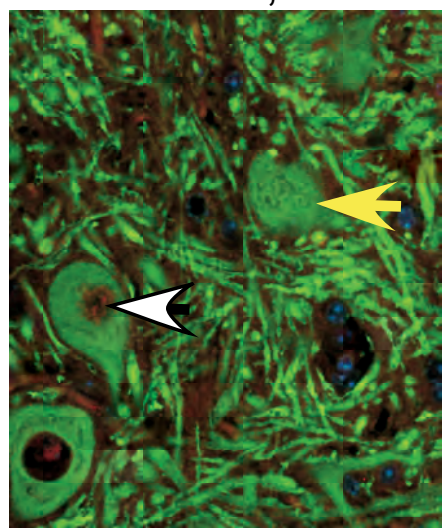

G WT, LACV

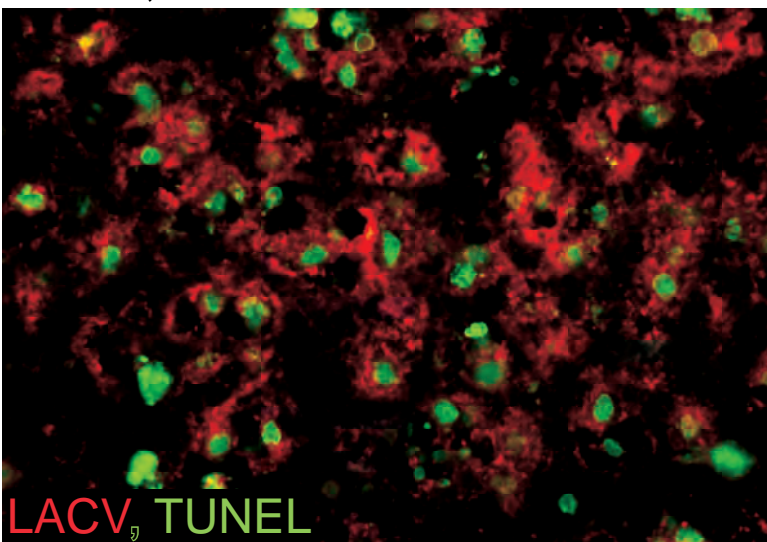

H *Sarm1*<sup>-/-</sup>, LACV

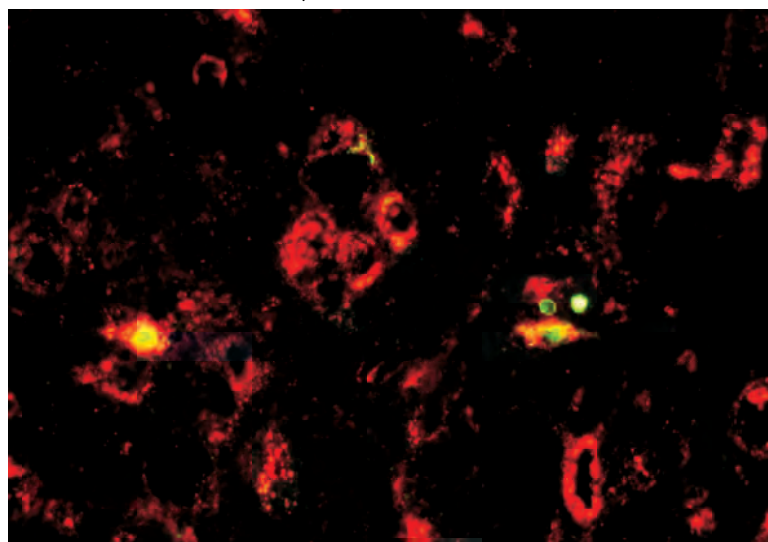

**Figure S1. SARM1 Expression in the Brain and Spinal Cord of LACV-Infected Mice, Related to Figure 3**

(A-B) Brain tissue from (A) mock and (B) LACV-infected wildtype mice at 5-7 dpi were analyzed for SARM1 expression as described in methods. SARM1 staining was observed around cell bodies in (A) mock-infected mice, but was also found in axons of localized regions in the cortex in (B) LACV-infected mice. Images are 200X.

(C) Western blot analysis of mitochondrial fractions from lysates of brain tissue from mock or LACV-infected wildtype mice at 5 dpi stained for SARM1 or mitochondrial protein CoxIV.

(D-F) SARM1 expression in spinal cord of (D) uninfected and (E-F) LACV-infected (D-E) wildtype and (F) *Sarm1*<sup>-/-</sup> mice. SARM1 (red fluorescence) localized to the (D-E) cell body and (E) axons of MAP-2-positive (green fluorescence) neurons from wildtype mice (yellow arrow), but not *Sarm1*<sup>-/-</sup> mice. Some staining of nuclei was also observed (white arrow), but this was also observed in *Sarm1*<sup>-/-</sup> mice suggesting non-specificity. Images are 200X.

(G-H) Immunohistochemistry of brain tissue from LACV-infected (G) wildtype and (H) *Sarm1*<sup>-/-</sup> mice stained for TUNEL (green fluorescence) and the G2 protein of LACV (red fluorescence). Images are 400X.

Fig. S2

A Oxidative stress response genes

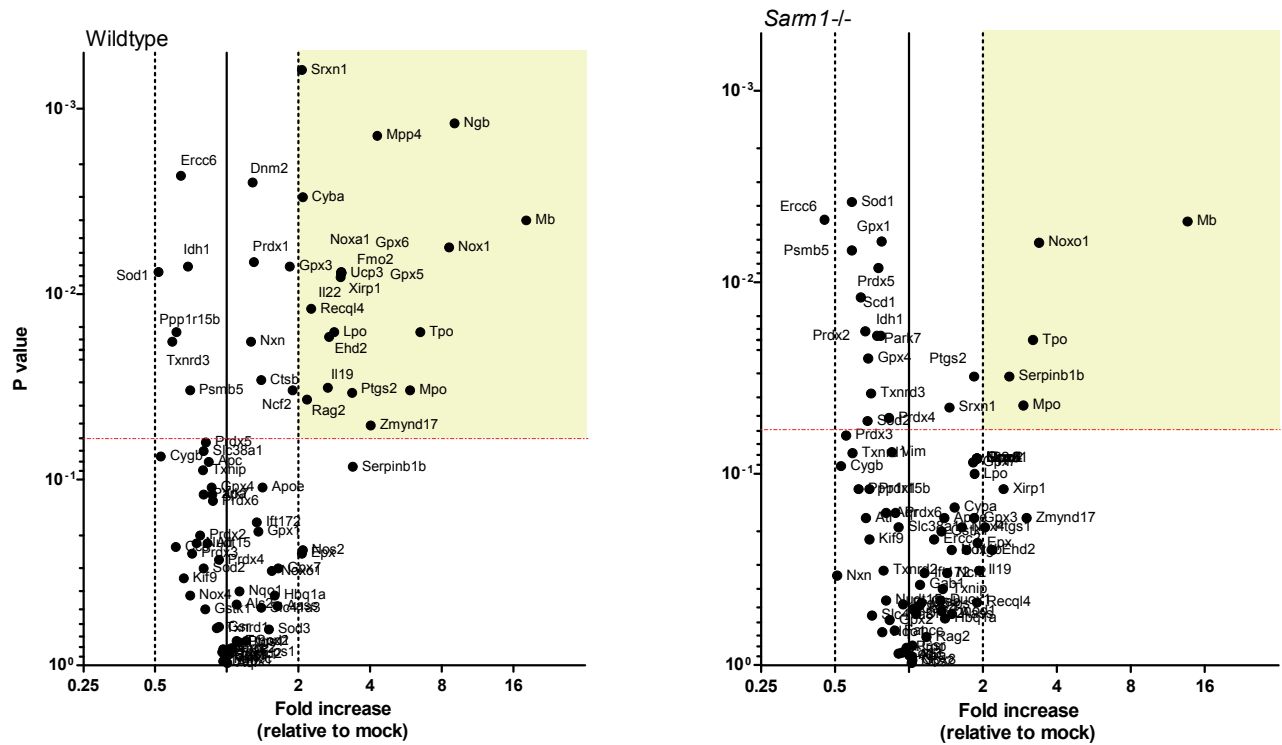

**Figure S2. SARM1 Expression Is Necessary for LACV-Induced Upregulation of Oxidative Stress Response Genes, but Not Type I IFN Response Genes, Related to Figure 4**

(A-B) Primary cortical neurons from wildtype and *Sarm1*<sup>-/-</sup> mice were infected with LACV at a MOI of 0.01. At 30 hpi, RNA was extracted and used to generate cDNA. cDNA from 3 mock and 3 LACV-infected neuron cultures generated from wildtype and *Sarm1*<sup>-/-</sup> mice were analyzed for the expression of (A) oxidative stress response genes or (B) type I IFN response genes. Results are shown as a volcano plot of mock vs LACV-infected cells for each mouse strain. Data are shown as the fold increases in gene expression of LACV-infected samples relative to mock-infected samples. Yellow or blue areas indicate regions of a 2-fold difference relative to mock-infected controls (X axis), with significance between samples indicated by *P* values of <0.05 (Y axis). The only significant difference between wildtype and *Sarm1*<sup>-/-</sup> mice in the IFN response gene analysis was annexin A11, which was increased by two-fold in wildtype cells compared to *Sarm1*<sup>-/-</sup> cells.

Fig. S3

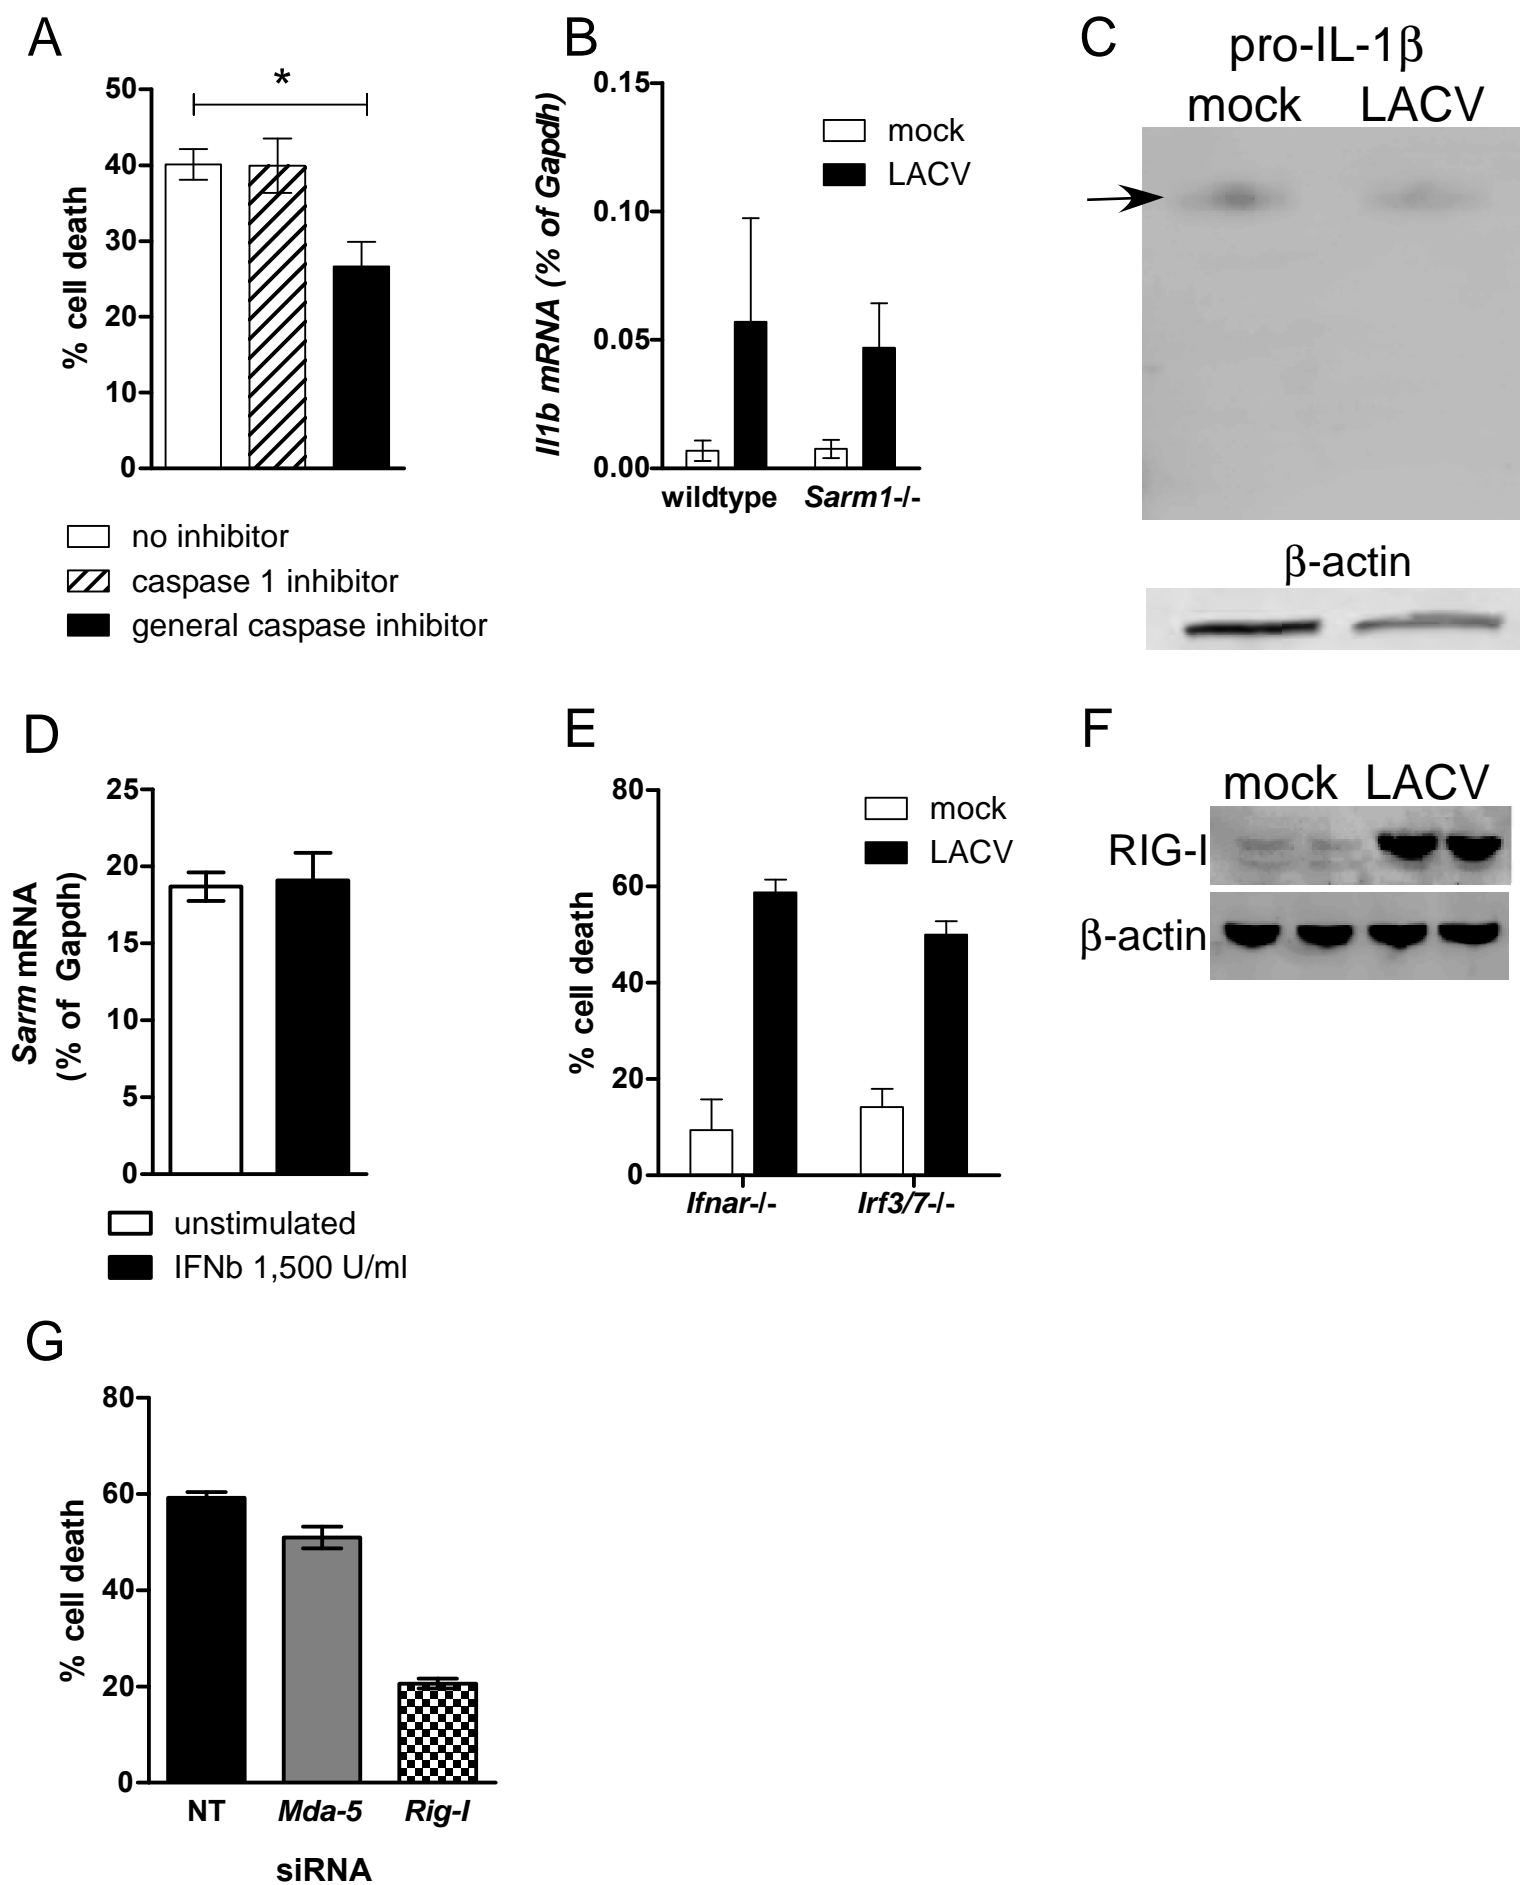

**Figure S3. IL-1 and Type I IFN Are Not Responsible for SARM1-Mediated Cell Death, Related to Figure 2**

(A) Wildtype neurons were treated with 200 uM of general caspase-inhibitor (ZVAD-FMK) and 10 uM of caspase-1 inhibitor (Z-WEHD-FMK) at the time of LACV infection and after 36 hpi cell viability was measured by MTT assay. Data are the mean  $\pm$  SEM of 3-6 samples per group.

(B) RNA isolated at 30 hpi from wildtype and *Sarm1*<sup>-/-</sup> neurons infected with LACV or with mock supernatants were analyzed for expression of *Il-1b* mRNA. Data are presented as gene expression relative to *Gapdh* mRNA expression and are the mean  $\pm$  SEM of 3-4 replicates per group.

(C) Analysis of IL-1 $\beta$  from whole cell lysates of mock and LACV-infected neurons at 36 hpi showing pro-IL1 $\beta$ , but not cleavage products, during LACV infection.  $\beta$ -actin was used as loading control (lower panel).

(D) Neuron cultures were stimulated with 1,500 U/ml of IFN-beta and RNA isolated at 6, 24 (not shown) and 48 hpi (shown). Expression of *Sarm1* mRNA was measured by real-time PCR analysis with no difference of expression observed at any time point.

(E) Neurons from *Ifnar* or *Irf3/Irf7* deficient mice were infected with LACV and analyzed for cell death at 36 hpi as described in Fig. 2. The level of LACV-induced cell death was comparable to that observed in wildtype controls at 36 hpi. Data are the average of 4-6 wells per group and are representative of at least two experiments per strain.

(F) RIG-I levels in brain homogenate from mock and LACV-infected mice at 5 dpi. Brain tissue from mock and LACV-infected mice was homogenized and analyzed for RIG-I protein levels by western blot analysis. Equal volume of protein was loaded in each lane

(G) siRNA specific to *Rig-I*, but not *Mda-5*, inhibits LACV-induced cell death. Cells were treated as described as in Fig. 2, except that siRNA against *Rig-I* or *Mda-5* were utilized. Data are shown as the mean  $\pm$  SEM of 4-6 replicates per group.

Fig. S4.

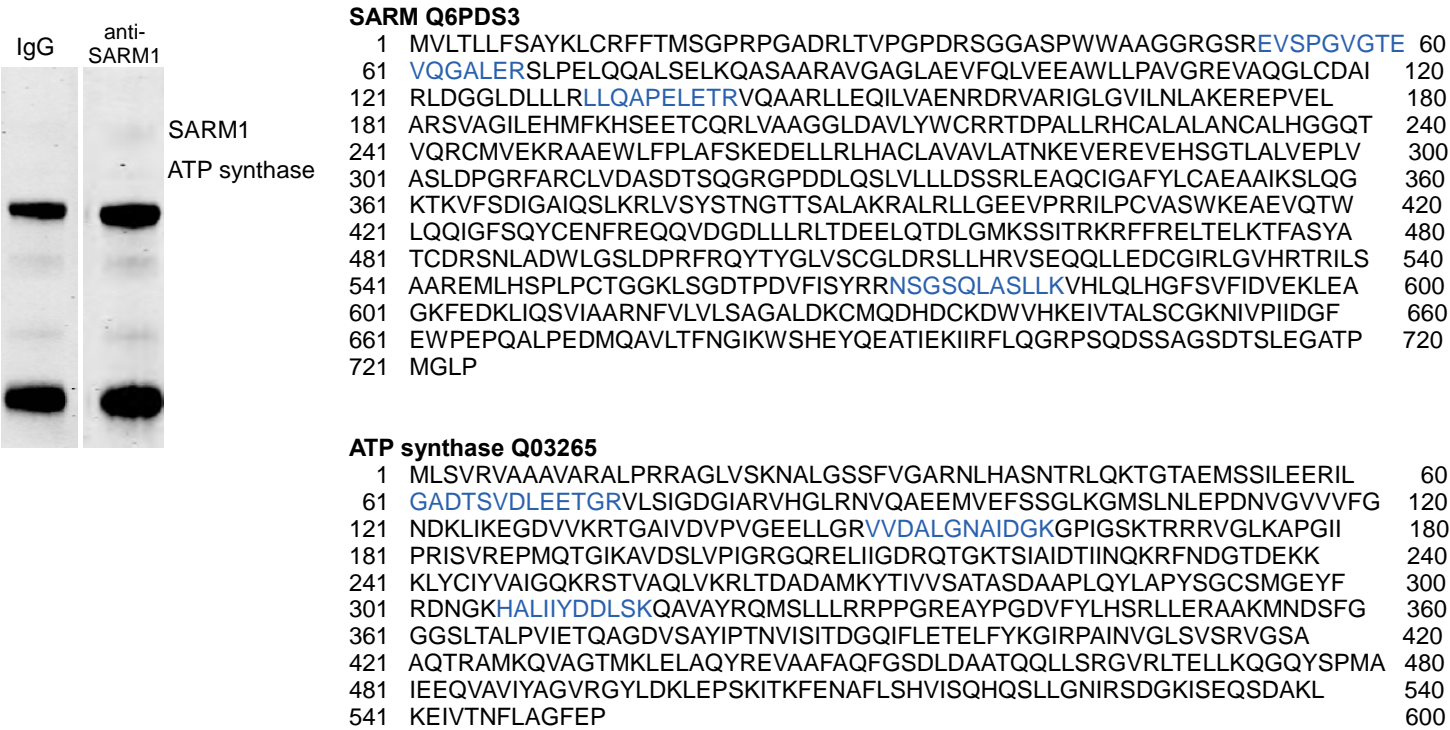

**Figure S4. Immunoprecipitation of SARM1 Results in Pull Down of ATP Synthase, Related to Figure 5**

Immunoprecipitation was performed as described in Fig. 6 and run on an SDS-PAGE gel. Two bands were identified in the anti-SARM1 immunoprecipitation that were not observed in the IgG control. The top band was identified as SARM1 based on 3 peptides (blue sequence) detected in that sample by tandem mass spectroscopy. The second band was identified as ATP synthase based on detection of 3 peptides (shown in blue).

Fig. S5.

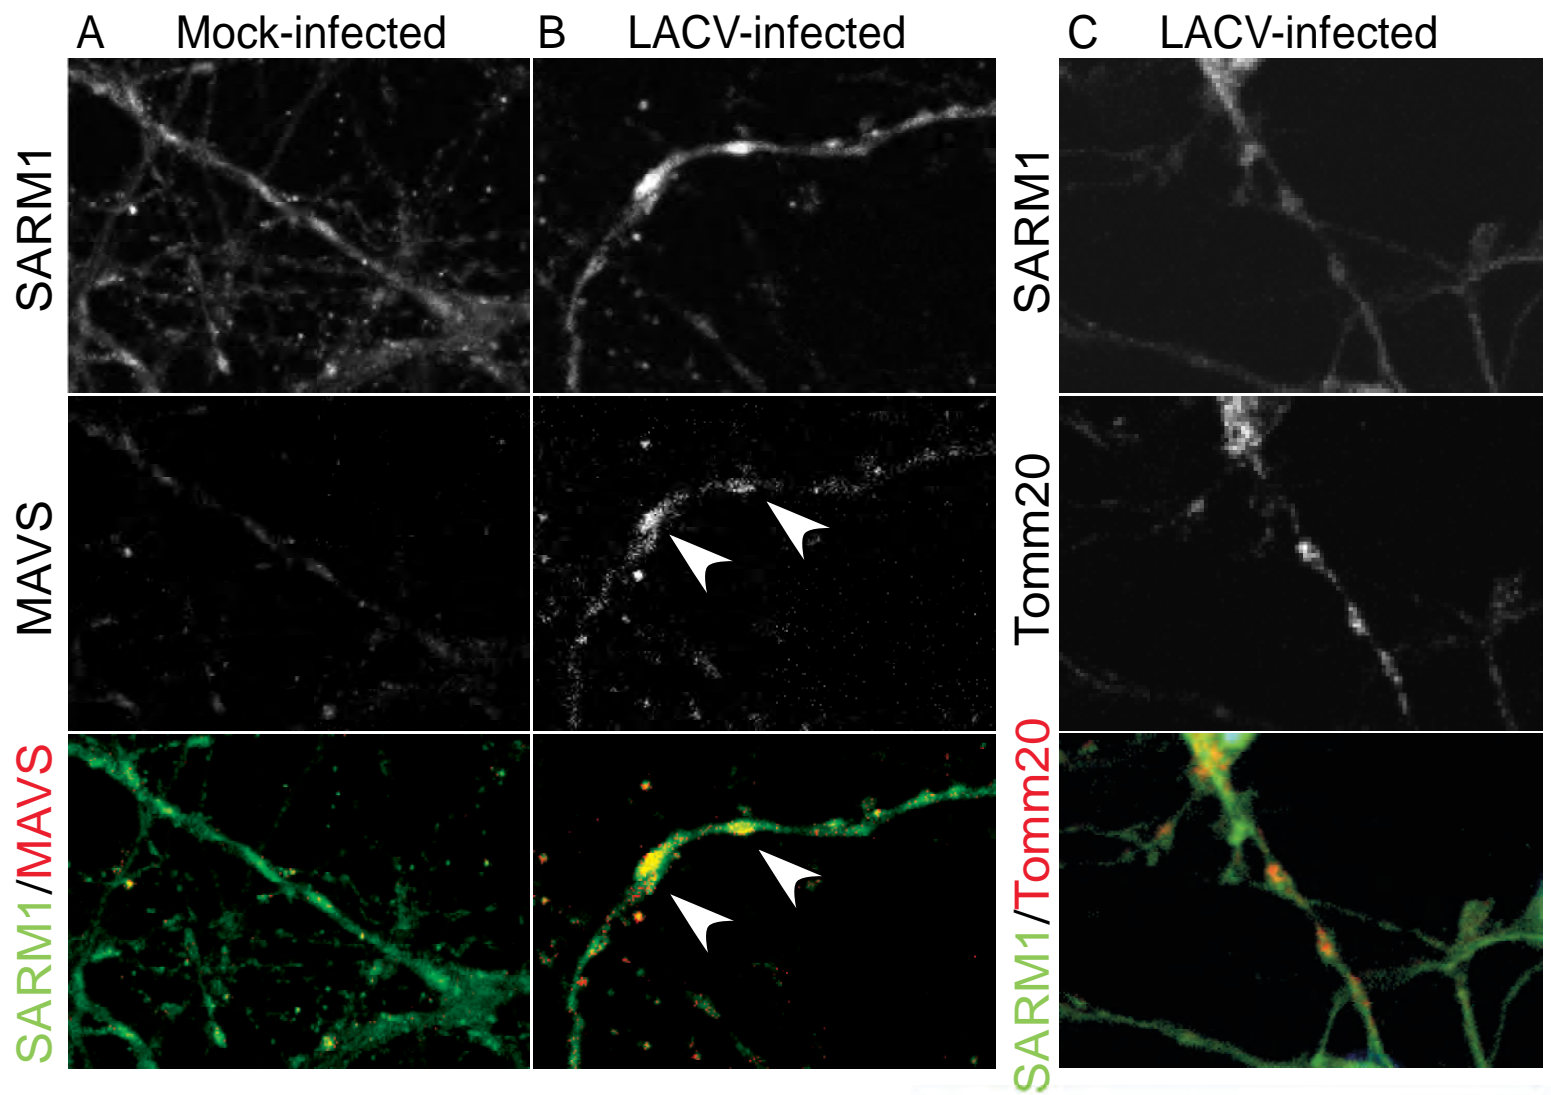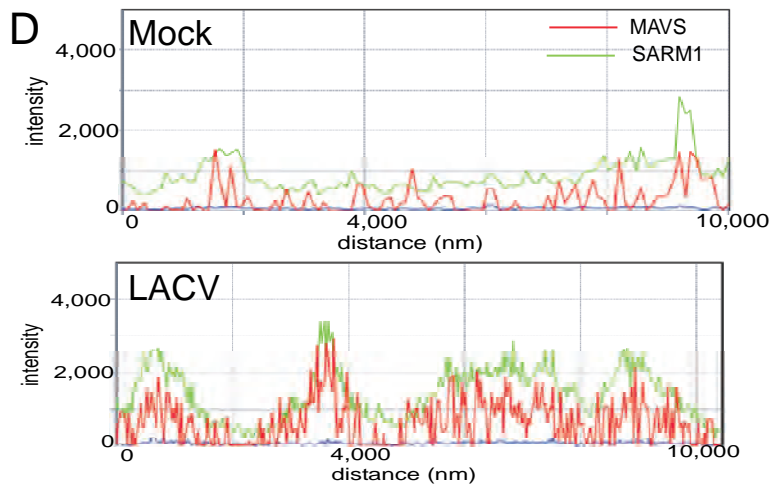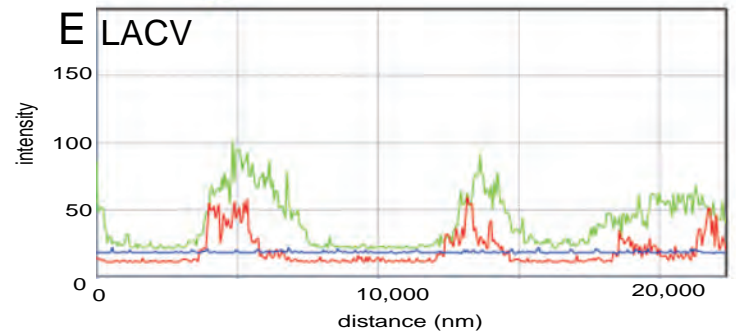

**Figure S5. MAVS Colocalizes with SARM1 in Neurons during LACV Infection, Related to Figure 6**

(A-C) Mock and LACV-infected neurons from wildtype mice at 36 hpi were stained anti-SARM1 (green fluorescence) and (A-B) anti-MAVS (red fluorescence) or (C) anti-Tomm20 (red fluorescence) and analyzed by confocal microscopy. Shown are axons from (A) mock or (B-C) LACV-infected neurons.

(D-E) Histograms from a 10,000 nm stretch of axon are shown below for both (D) MAVS and SARM1 colocalization and (E) Tomm20 and SARM1 colocalization. Images are representative of 3-4 images per culture from two to four separate experiments.

Fig. S6.

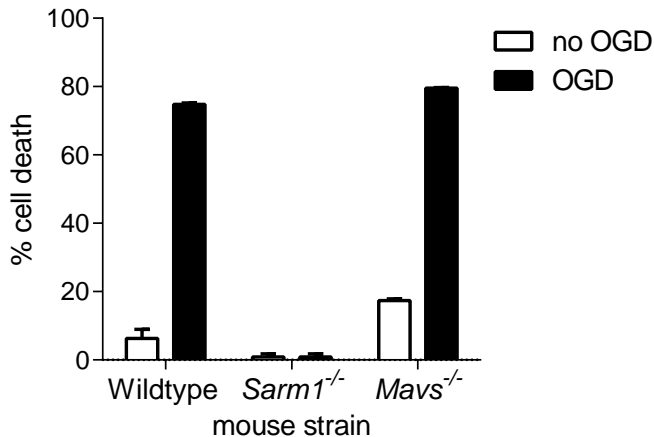

**Figure S6. MAVS Does Not Influence OGD-Induced Neuronal Death, Related to Figure 7**

Neurons from wildtype, *Sarm1*<sup>-/-</sup>-or *Mavs*<sup>-/-</sup>-mice were cultured under normal or OGD conditions as described in the methods for 1-3 hrs and then analyzed for cell death using an MTT assay. Data are from the 3 hour time point and are the mean $\pm$ -SEM of 3-8 samples per treatment group per strain.
